# Supplementary material for: Machine-learning-based automated quantification machine for virus plaque assay counting
Source: PeerJ journal article supplement (doi:10.7717/peerj-cs.878), 2022-03-04

No.                      Raw Images                      Counting Images by Expert                      Counting Image by Machine

| ลำดับที่ | ภาพต้นฉบับ                                                                          | ภาพที่นับโดยคน                                                                          | ภาพที่นับโดยเครื่อง                                                                      |
|----------|-------------------------------------------------------------------------------------|-----------------------------------------------------------------------------------------|------------------------------------------------------------------------------------------|
| 1        | 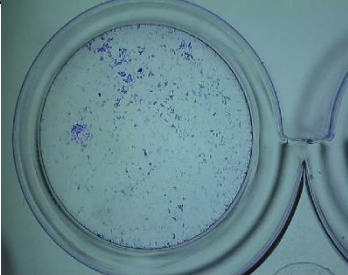   |  N/A   |  N/A   |
| 2        |    |  13    |  8     |
| 3        |   |  12   |  6    |
| 4        |  |  N/A |  N/A |
| 5        |  |  N/A |  N/A |
| 6        |  |  15  |  11  |

|    |                                                                                     |                                                                                     |                                                                                      |
|----|-------------------------------------------------------------------------------------|-------------------------------------------------------------------------------------|--------------------------------------------------------------------------------------|
| 7  | 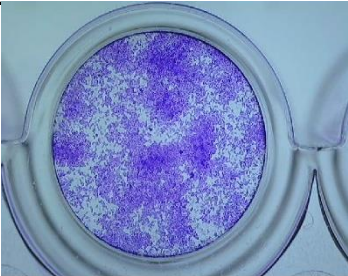   |    |    |
| 8  |    |    |    |
| 9  |    |    |    |
| 10 |   |   |   |
| 11 |  |  |  |
| 12 |  |  |  |



|    |  |  |  |
|----|--|--|--|
| 13 |  |  |  |
| 14 |  |  |  |
| 15 |  |  |  |
| 16 |  |  |  |
| 17 |  |  |  |
| 18 |  |  |  |

|    |                                                                                     |                                                                                     |                                                                                      |
|----|-------------------------------------------------------------------------------------|-------------------------------------------------------------------------------------|--------------------------------------------------------------------------------------|
| 19 | 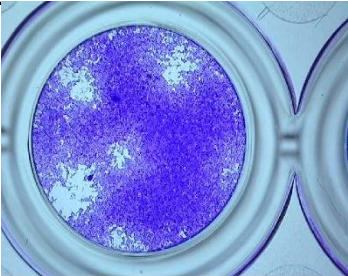   |    |    |
| 20 |    |    |    |
| 21 |    |    |    |
| 22 |   |   |   |
| 23 |  |  |  |
| 24 |  |  |  |



|    |                                                                                     |                                                                                     |                                                                                      |   |
|----|-------------------------------------------------------------------------------------|-------------------------------------------------------------------------------------|--------------------------------------------------------------------------------------|---|
| 25 | 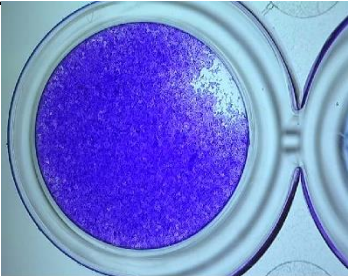   |    |    | 2 |
| 26 |    |    |    | 0 |
| 27 |    |    |    | 2 |
| 28 |   |   |   | 1 |
| 29 |  |  |  | 1 |
| 30 |  |  |  | 0 |

|    |                                                                                     |                                                                                     |                                                                                      |
|----|-------------------------------------------------------------------------------------|-------------------------------------------------------------------------------------|--------------------------------------------------------------------------------------|
| 31 | 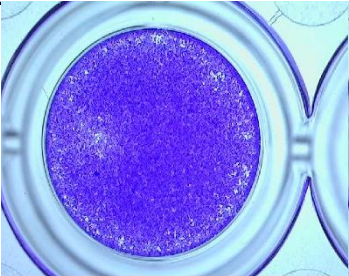   |    |    |
| 32 |    |    |    |
| 33 |    |    |    |
| 34 |   |   |   |
| 35 |  |  |  |
| 36 |  |  |  |

|    |                                                                                     |                                                                                     |                                                                                      |
|----|-------------------------------------------------------------------------------------|-------------------------------------------------------------------------------------|--------------------------------------------------------------------------------------|
| 37 | 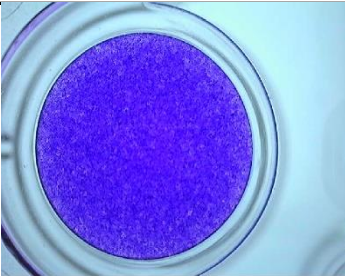   |    |    |
| 38 |    |    |    |
| 39 |    |    |    |
| 40 |   |   |   |
| 41 |  |  |  |
| 42 |  |  |  |



|    |                                                                                     |                                                                                     |                                                                                      |
|----|-------------------------------------------------------------------------------------|-------------------------------------------------------------------------------------|--------------------------------------------------------------------------------------|
| 43 | 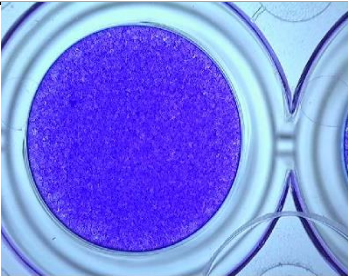   |    |    |
| 44 |    |    |    |
| 45 |    |    |    |
| 46 |   |   |   |
| 47 |  |  |  |
| 48 |  |  |  |



|    |                                                                                     |                                                                                     |                                                                                      |
|----|-------------------------------------------------------------------------------------|-------------------------------------------------------------------------------------|--------------------------------------------------------------------------------------|
| 49 | 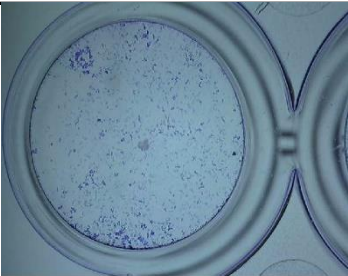   |    |    |
| 50 |    |    |    |
| 51 |    |    |    |
| 52 |   |   |   |
| 53 |  |  |  |
| 54 |  |  |  |

|    |                                                                                     |                                                                                     |                                                                                      |     |
|----|-------------------------------------------------------------------------------------|-------------------------------------------------------------------------------------|--------------------------------------------------------------------------------------|-----|
| 55 | 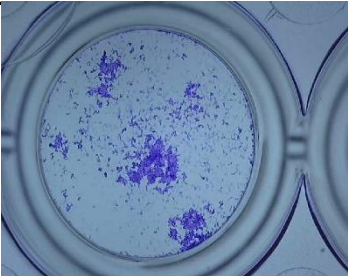   |    |    | N/A |
| 56 |    |    |    | N/A |
| 57 |    |    |    | N/A |
| 58 |   |   |   | N/A |
| 59 |  |  |  | 8   |
| 60 |  |  |  | N/A |

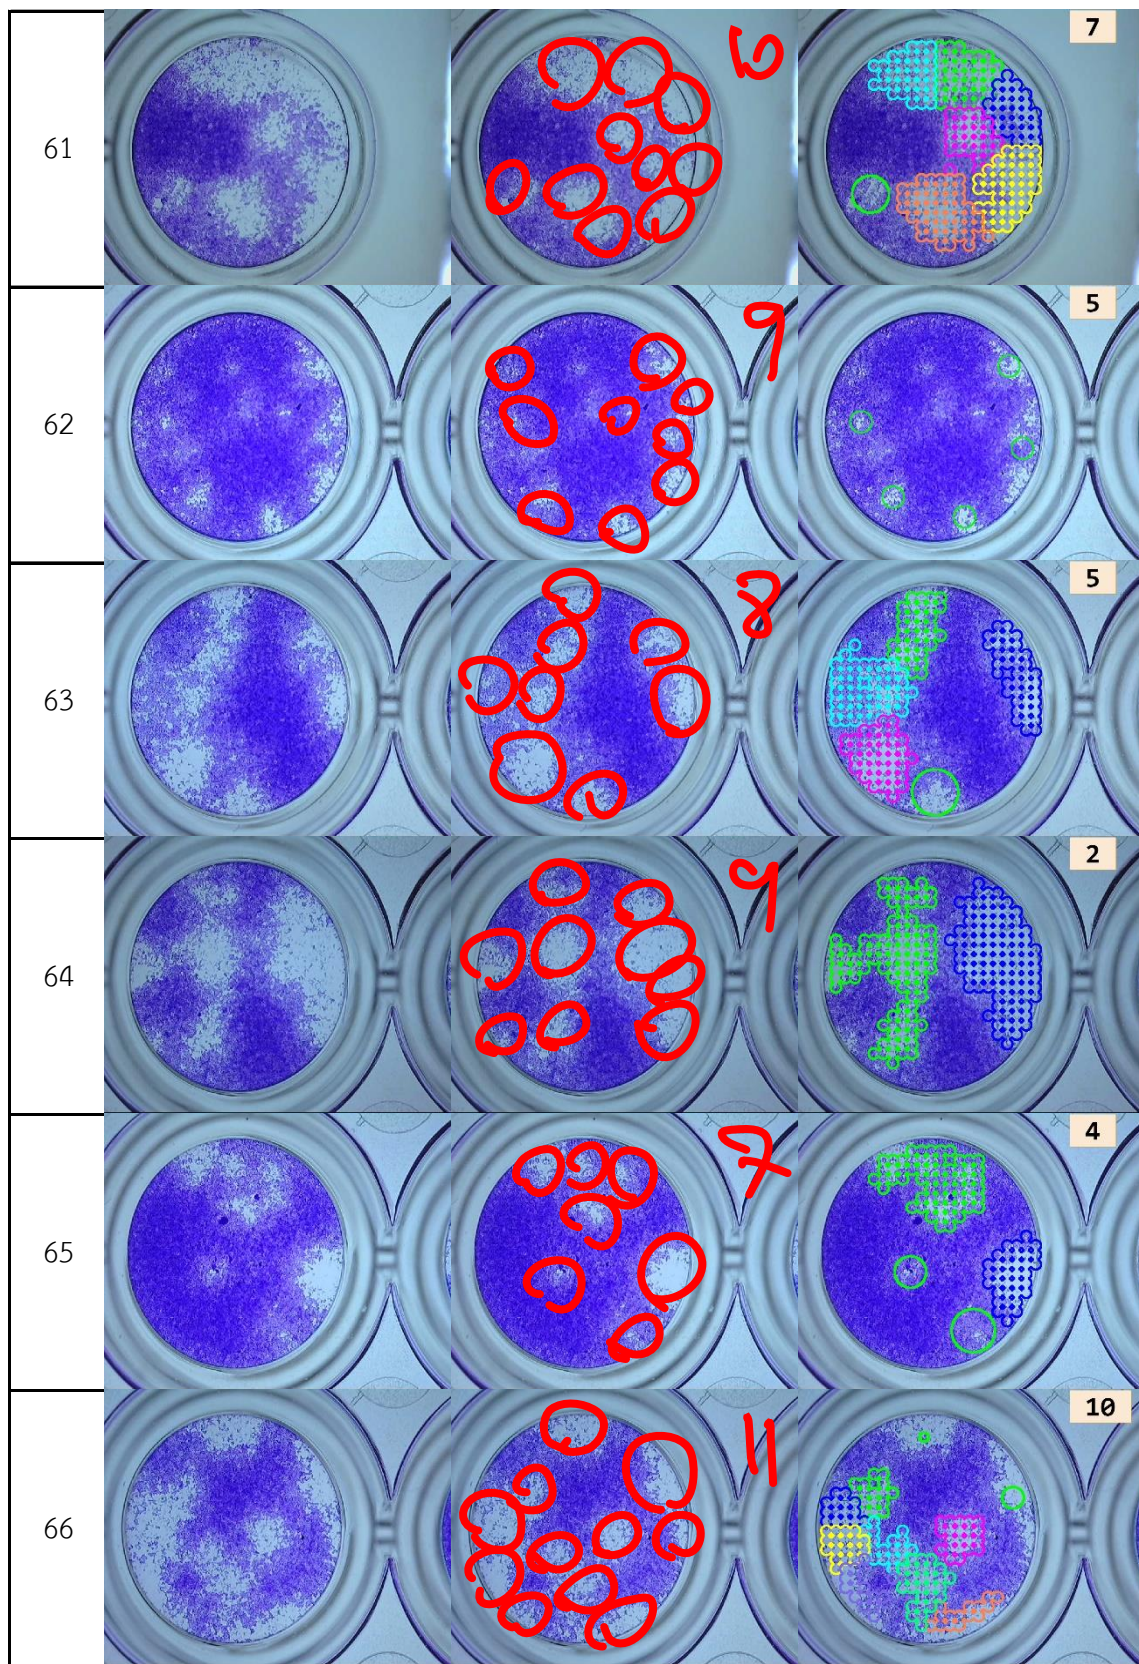



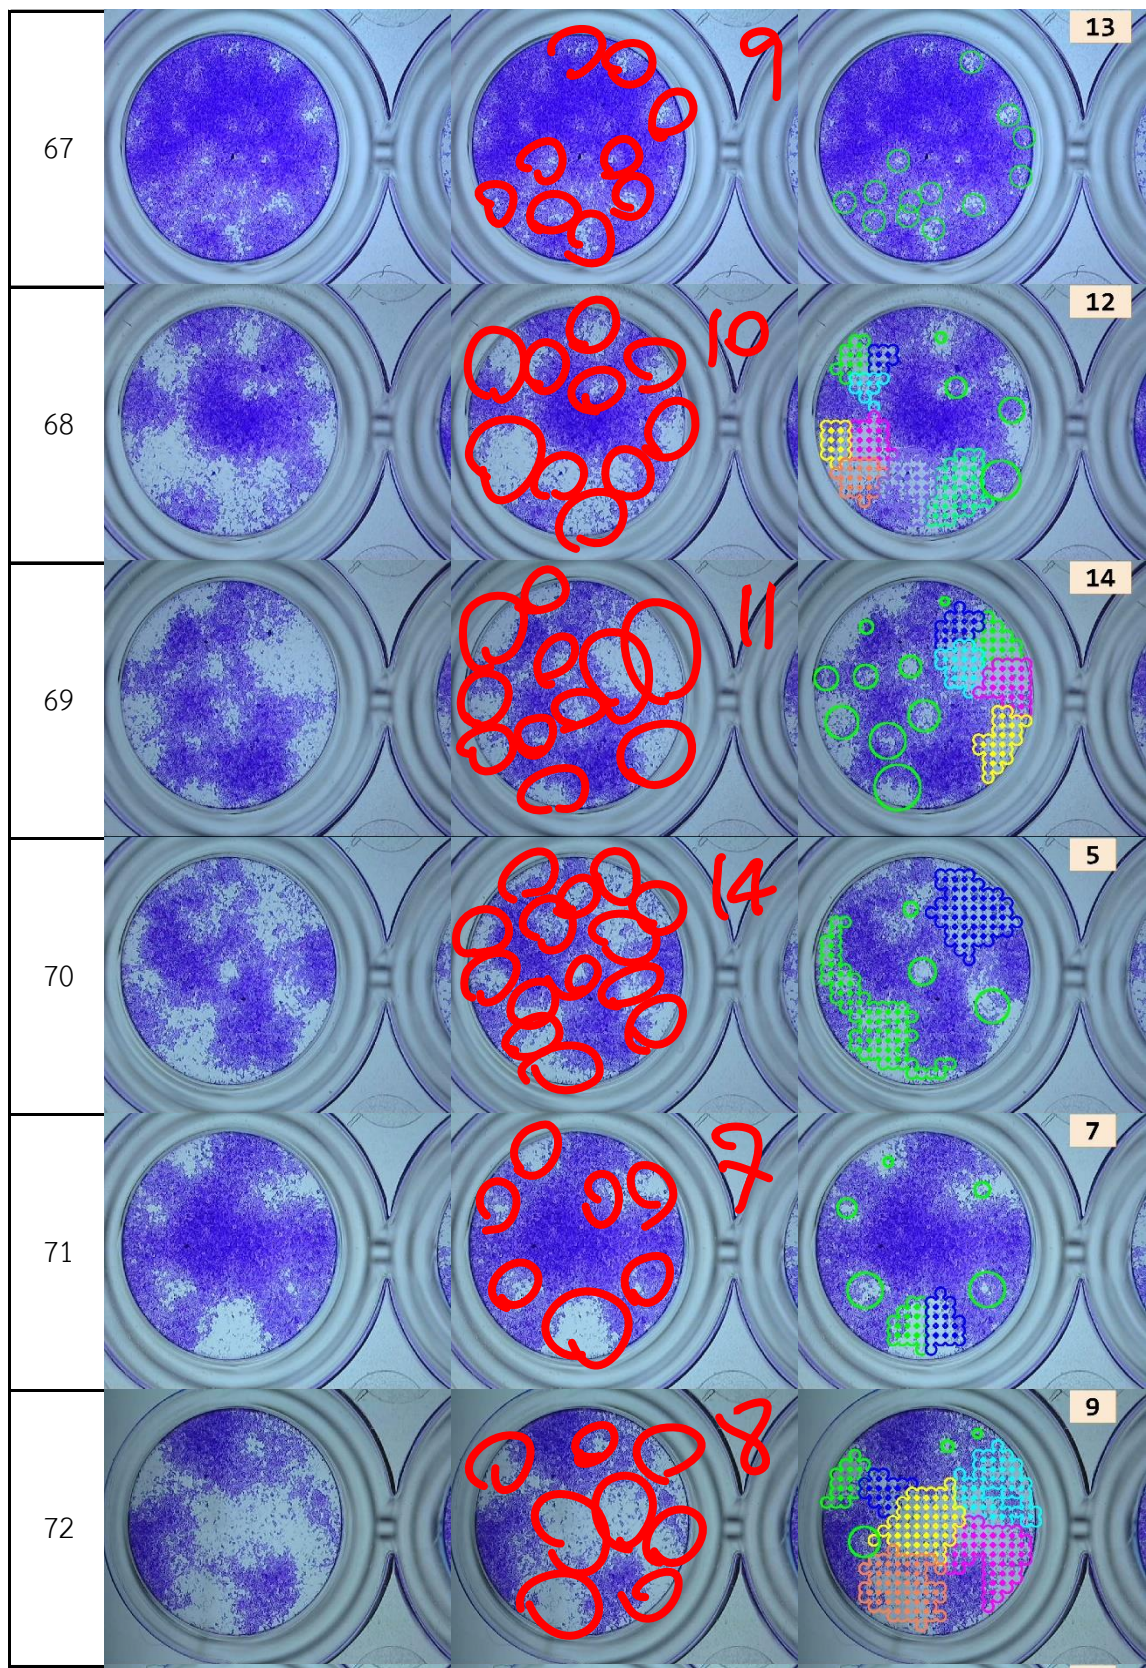

|    |                                                                                     |                                                                                     |                                                                                      |
|----|-------------------------------------------------------------------------------------|-------------------------------------------------------------------------------------|--------------------------------------------------------------------------------------|
| 73 | 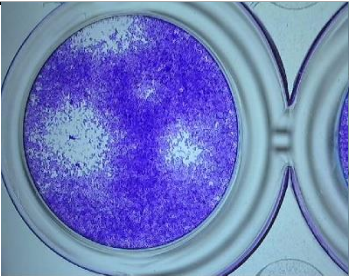   |    |    |
| 74 |    |    |    |
| 75 |    |    |    |
| 76 |   |   |   |
| 77 |  |  |  |
| 78 |  |  |  |



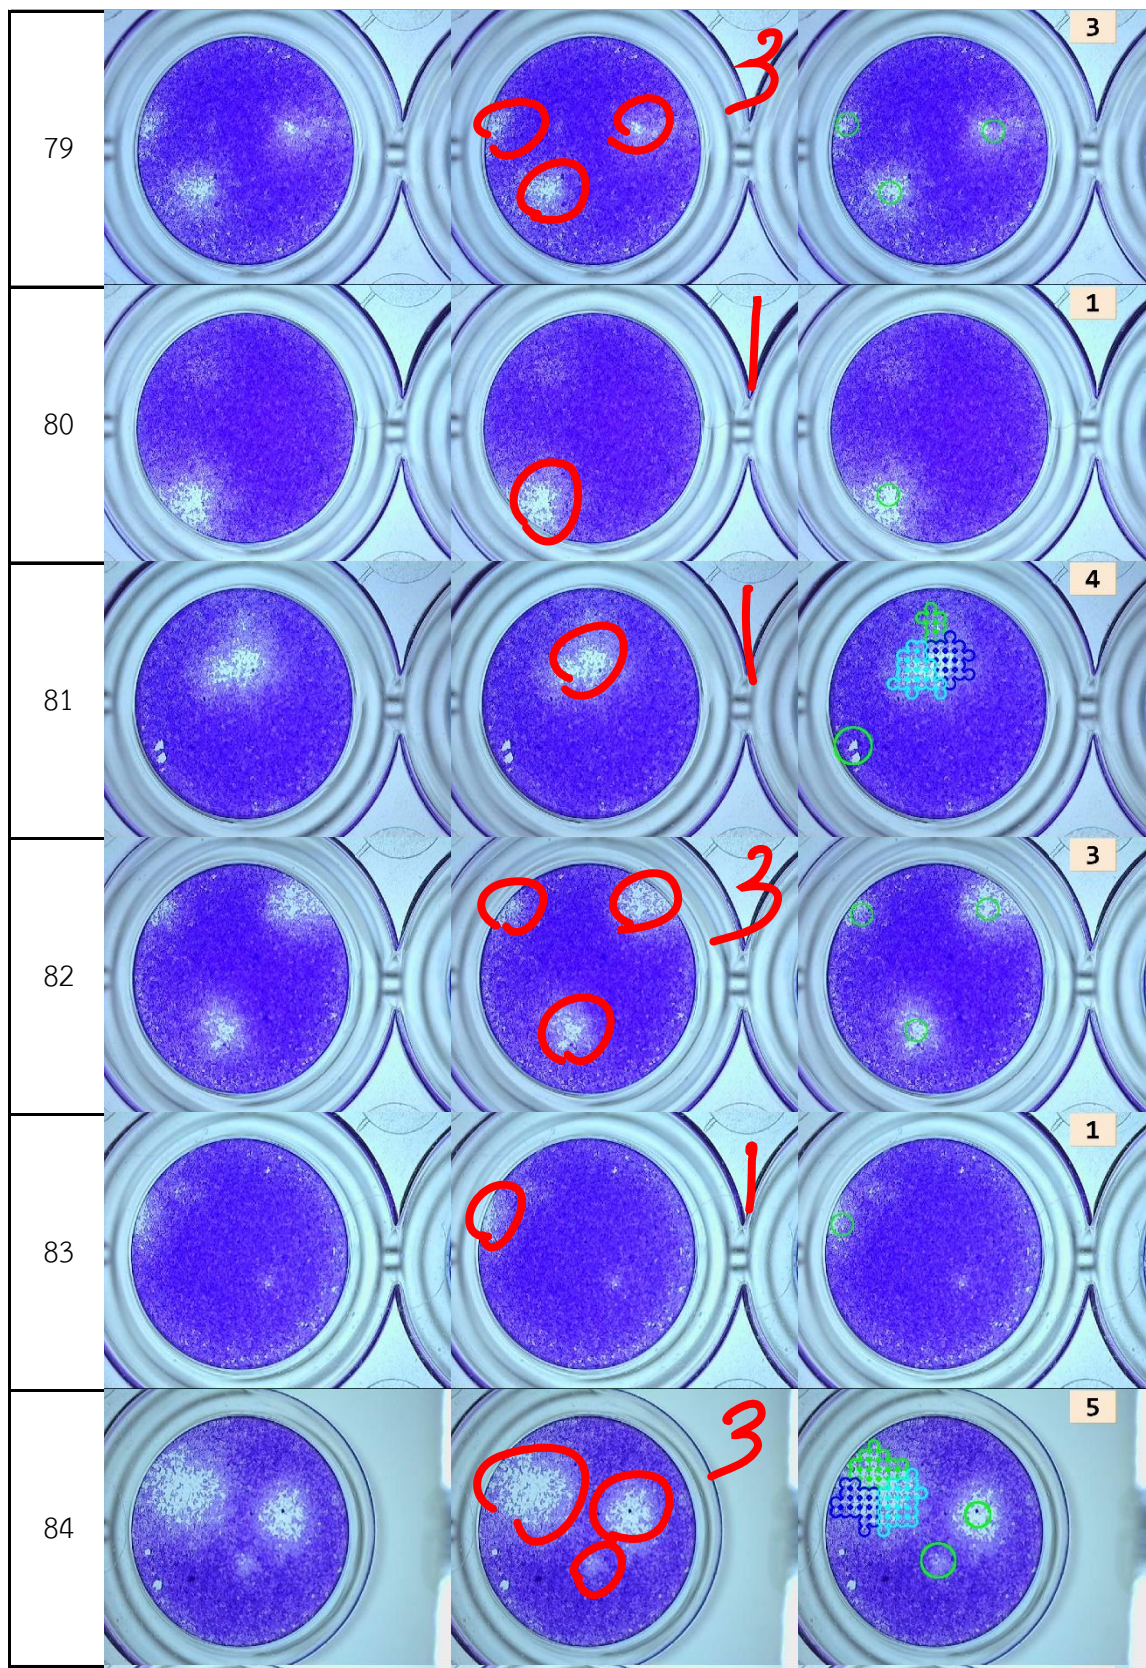



|    |                                                                                     |                                                                                     |                                                                                      |
|----|-------------------------------------------------------------------------------------|-------------------------------------------------------------------------------------|--------------------------------------------------------------------------------------|
| 85 | 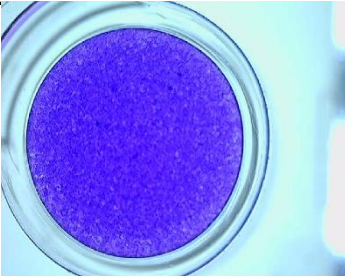   |    |    |
| 86 |    |    |    |
| 87 |    |    |    |
| 88 |   |   |   |
| 89 |  |  |  |
| 90 |  |  |  |

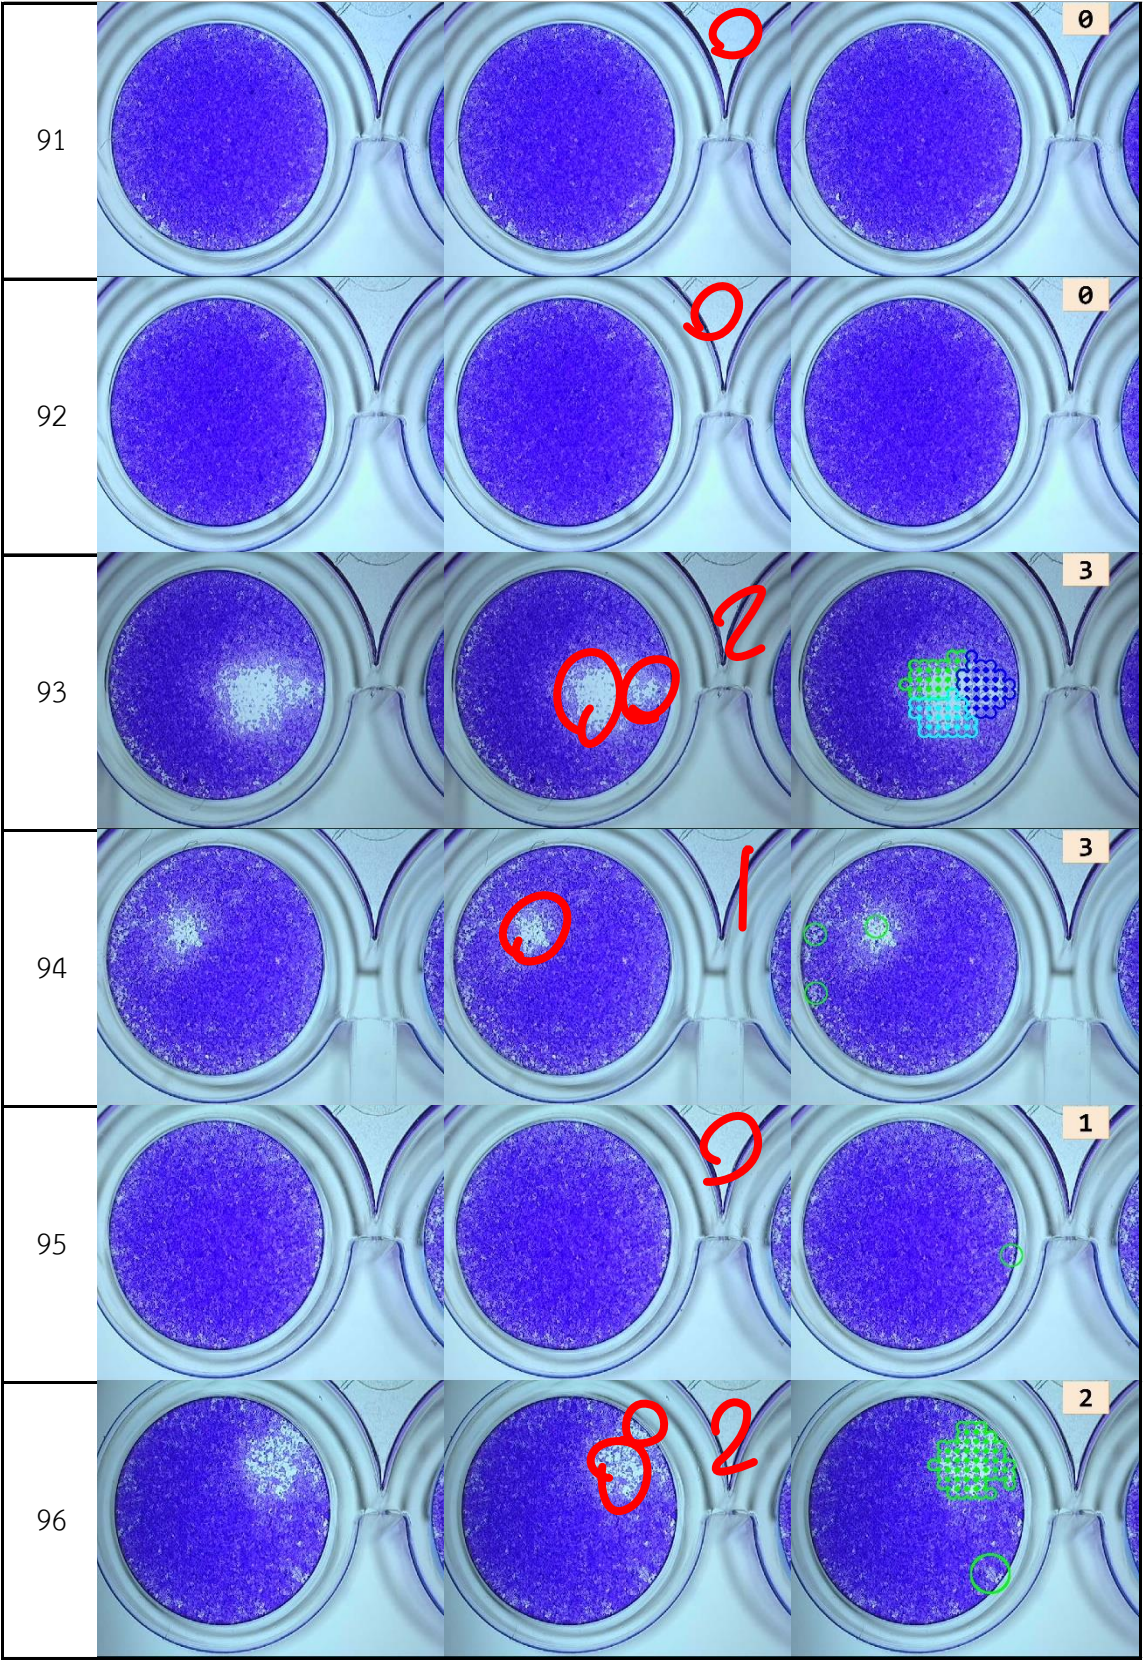

Supplement: plate27.pdf [file plate27.pdf]
