# Supplementary material for: Machine-learning-based automated quantification machine for virus plaque assay counting
Source: PeerJ journal article supplement (doi:10.7717/peerj-cs.878), 2022-03-04
Supplement: plate4.pdf [file plate4.pdf]

No.                      Raw Images                      Counting Images by Expert                      Counting Image by Machine

| ลำดับที่ | ภาพต้นฉบับ                                                                          | ภาพที่นับโดยคน                                                                      | ภาพที่นับโดยเครื่อง                                                                  |
|----------|-------------------------------------------------------------------------------------|-------------------------------------------------------------------------------------|--------------------------------------------------------------------------------------|
| 1        | 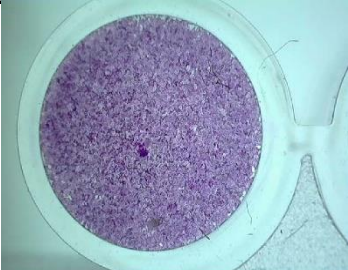   |    |    |
| 2        |    |    |    |
| 3        |   |   |   |
| 4        |  |  |  |
| 5        |  |  |  |
| 6        |  |  |  |

|    |                                                                                     |                                                                                     |                                                                                                   |
|----|-------------------------------------------------------------------------------------|-------------------------------------------------------------------------------------|---------------------------------------------------------------------------------------------------|
| 7  | 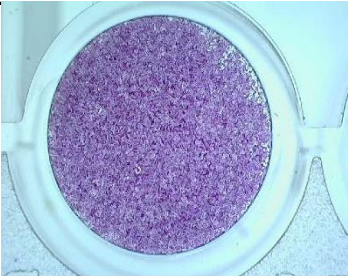   |    |  <div>1</div>   |
| 8  |    |    |  <div>0</div>   |
| 9  |    |    |  <div>0</div>   |
| 10 |   |   |  <div>0</div>  |
| 11 |  |  |  <div>0</div> |
| 12 |  |  |  <div>0</div> |

|    |                                                                                     |                                                                                     |                                                                                      |
|----|-------------------------------------------------------------------------------------|-------------------------------------------------------------------------------------|--------------------------------------------------------------------------------------|
| 13 |    |    |    |
| 14 |    |    |    |
| 15 |    |    |    |
| 16 |   |   |   |
| 17 |  |  |  |
| 18 |  |  |  |



|    |                                                                                     |                                                                                     |                                                                                      |
|----|-------------------------------------------------------------------------------------|-------------------------------------------------------------------------------------|--------------------------------------------------------------------------------------|
| 19 | 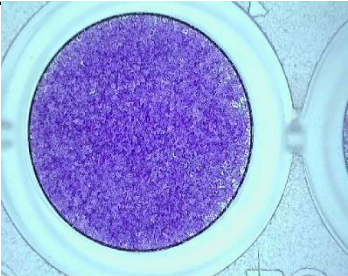   |    |    |
| 20 |    |    |    |
| 21 |    |    |    |
| 22 |   |   |   |
| 23 |  |  |  |
| 24 |  |  |  |

|    |                                                                                     |                                                                                     |                                                                                      |
|----|-------------------------------------------------------------------------------------|-------------------------------------------------------------------------------------|--------------------------------------------------------------------------------------|
| 25 | 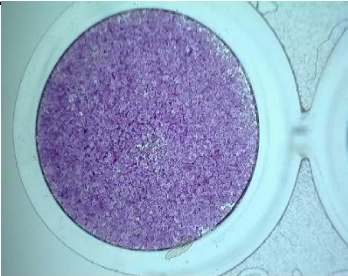   |    |    |
| 26 |    |    |    |
| 27 |    |    |    |
| 28 |   |   |   |
| 29 |  |  |  |
| 30 |  |  |  |

|    |                                                                                     |                                                                                     |                                                                                      |    |
|----|-------------------------------------------------------------------------------------|-------------------------------------------------------------------------------------|--------------------------------------------------------------------------------------|----|
| 31 | 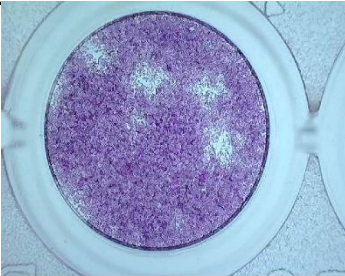   |    |    | 5  |
| 32 |    |    |    | 1  |
| 33 |    |    |    | 4  |
| 34 |   |   |   | 13 |
| 35 |  |  |  | 0  |
| 36 |  |  |  | 7  |



|    |                                                                                     |                                                                                     |                                                                                      |
|----|-------------------------------------------------------------------------------------|-------------------------------------------------------------------------------------|--------------------------------------------------------------------------------------|
| 37 | 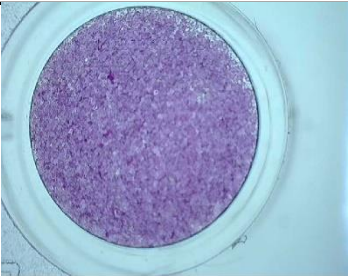   |    |    |
| 38 |    |    |    |
| 39 |    |    |    |
| 40 |   |   |   |
| 41 |  |  |  |
| 42 |  |  |  |

|    |                                                                                     |                                                                                     |                                                                                      |
|----|-------------------------------------------------------------------------------------|-------------------------------------------------------------------------------------|--------------------------------------------------------------------------------------|
| 43 |    |    |    |
| 44 |    |    |    |
| 45 |    |    |    |
| 46 |   |   |   |
| 47 |  |  |  |
| 48 |  |  |  |



|    |                                                                                     |                                                                                     |                                                                                      |
|----|-------------------------------------------------------------------------------------|-------------------------------------------------------------------------------------|--------------------------------------------------------------------------------------|
| 49 |    |    |    |
| 50 |    |    |    |
| 51 |    |    |    |
| 52 |   |   |   |
| 53 |  |  |  |
| 54 |  |  |  |

|    |                                                                                     |                                                                                     |                                                                                      |
|----|-------------------------------------------------------------------------------------|-------------------------------------------------------------------------------------|--------------------------------------------------------------------------------------|
| 55 |    |    |    |
| 56 |    |    |    |
| 57 |    |    |    |
| 58 |   |   |   |
| 59 |  |  |  |
| 60 |  |  |  |

|    |                                                                                     |                                                                                     |                                                                                      |
|----|-------------------------------------------------------------------------------------|-------------------------------------------------------------------------------------|--------------------------------------------------------------------------------------|
| 61 | 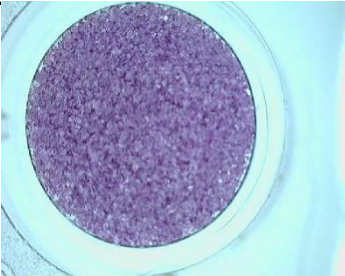   |    |    |
| 62 |    |    |    |
| 63 |    |    |    |
| 64 |   |   |   |
| 65 |  |  |  |
| 66 |  |  |  |



|    |                                                                                     |                                                                                     |                                                                                      |
|----|-------------------------------------------------------------------------------------|-------------------------------------------------------------------------------------|--------------------------------------------------------------------------------------|
| 67 | 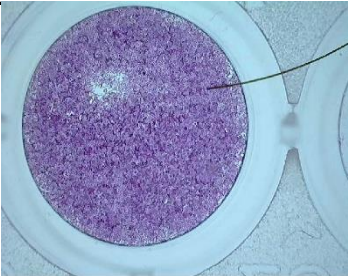   |    |    |
| 68 |    |    |    |
| 69 |    |    |    |
| 70 |   |   |   |
| 71 |  |  |  |
| 72 |  |  |  |

|    |                                                                                     |                                                                                     |                                                                                      |
|----|-------------------------------------------------------------------------------------|-------------------------------------------------------------------------------------|--------------------------------------------------------------------------------------|
| 73 | 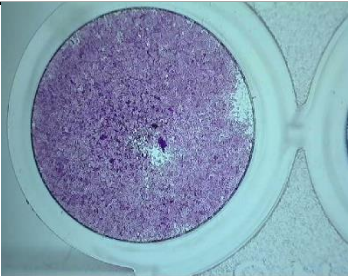   |    |    |
| 74 |    |    |    |
| 75 |    |    |    |
| 76 |   |   |   |
| 77 |  |  |  |
| 78 |  |  |  |

|    |                                                                                     |                                                                                     |                                                                                      |     |
|----|-------------------------------------------------------------------------------------|-------------------------------------------------------------------------------------|--------------------------------------------------------------------------------------|-----|
| 79 |   |                                                                                     |                                                                                      | N/A |
| 80 |   |                                                                                     |                                                                                      | N/A |
| 81 |   |                                                                                     |                                                                                      | N/A |
| 82 |  |                                                                                     |                                                                                      | N/A |
| 83 |  |  |  | 0   |
| 84 |  |  |  | 6   |



|    |                                                                                     |                                                                                     |                                                                                      |
|----|-------------------------------------------------------------------------------------|-------------------------------------------------------------------------------------|--------------------------------------------------------------------------------------|
| 85 | 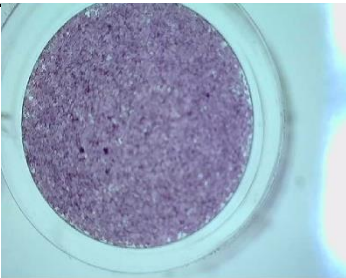   |    |    |
| 86 |    |    |    |
| 87 |    |    |    |
| 88 |   |   |   |
| 89 |  |  |  |
| 90 |  |  |  |

|    |  |  |  |   |
|----|--|--|--|---|
| 91 |  |  |  | 3 |
| 92 |  |  |  | 4 |
| 93 |  |  |  | 2 |
| 94 |  |  |  | 1 |
| 95 |  |  |  | 0 |
| 96 |  |  |  | 0 |
